# Supplementary material for: Lactobacillus delbrueckii subsp. bulgaricus F17 and Leuconostoc lactis H52 supernatants delay the decay of strawberry fruits: a microbiome perspective
Source: Royal Society of Chemistry journal article supplement (doi:10.1039/c9fo02079a), 2019-01-01

**Supplementary Figure 1.** Relative abundance of bacteria (A) and fungi (B) in strawberry microbial community at phylum level.

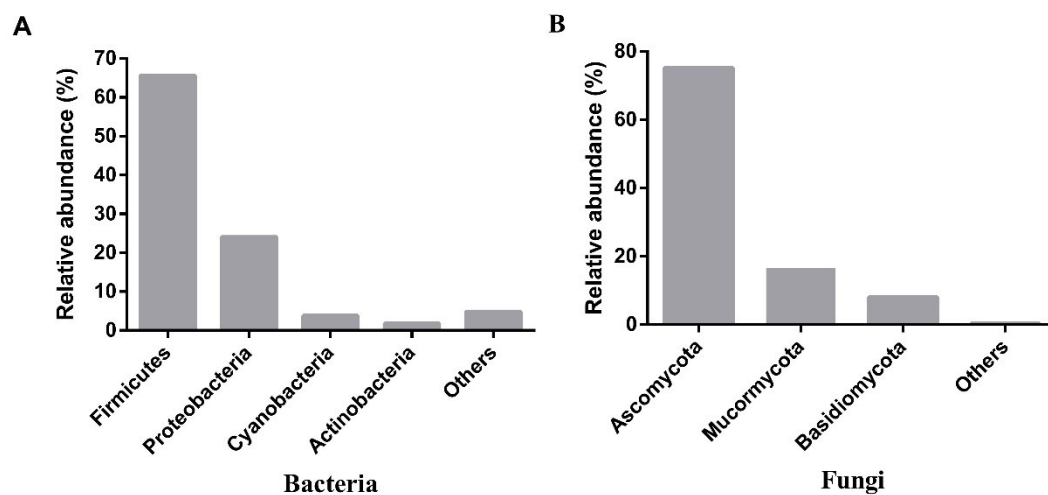

Supplement: c9fo02079a1.pdf [file c9fo02079a1.pdf]
