# Supplementary material for: Lactobacillus delbrueckii subsp. bulgaricus F17 and Leuconostoc lactis H52 supernatants delay the decay of strawberry fruits: a microbiome perspective
Source: Royal Society of Chemistry journal article supplement (doi:10.1039/c9fo02079a), 2019-01-01
Supplement: c9fo02079a2.pdf [file c9fo02079a2.pdf]

**Supplementary Table 1.** Good's Coverage of the community diversity index of  
bacteria and fungi.

| Bacterial |                 | □ | Fungi  |                 |
|-----------|-----------------|---|--------|-----------------|
| Groups    | Good's Coverage |   | Groups | Good's Coverage |
| C-0-1     | 0.99780304      |   | C-0-1  | 0.994707074     |
| C-0-2     | 0.993268304     |   | C-0-2  | 0.995492003     |
| C-0-3     | 0.996348022     |   | C-0-3  | 0.995687428     |
| C-0-4     | 0.991185542     |   | C-0-4  | 0.993335716     |
| C-1-1     | 0.986225579     |   | C-1-1  | 0.997255901     |
| C-1-2     | 0.970358211     |   | C-1-2  | 0.993924528     |
| C-1-3     | 0.953377204     |   | C-1-3  | 0.996276162     |
| C-1-4     | 0.962538068     |   | C-1-4  | 0.995883621     |
| C-2-1     | 0.999530128     |   | C-2-1  | 0.994511418     |
| C-2-2     | 0.999676773     |   | C-2-2  | 0.994904344     |
| C-2-3     | 0.977163093     |   | C-2-3  | 0.992159400     |
| C-2-4     | 0.980573149     |   | C-2-4  | 0.993335716     |
| C-3-1     | 0.927375049     |   | C-3-1  | 0.997255978     |
| C-3-2     | 0.987973443     |   | C-3-2  | 0.997451634     |
| C-3-3     | 0.985564894     |   | C-3-3  | 0.996472510     |
| C-3-4     | 0.984499128     |   | C-3-4  | 0.997255671     |
| C-4-1     | 0.999814508     |   | C-4-1  | 0.998824067     |
| C-4-3     | 0.997613281     |   | C-4-3  | 0.997059554     |
| C-4-4     | 0.999901378     |   | C-4-4  | 0.996275701     |
| F-0-1     | 0.993218887     |   | F-0-1  | 0.997059631     |
| F-0-2     | 0.998726317     |   | F-0-2  | 0.992943482     |
| F-0-3     | 0.992290661     |   | F-0-3  | 0.994904036     |
| F-0-4     | 0.992520008     |   | F-0-4  | 0.996667397     |
| F-1-1     | 0.982245071     |   | F-1-1  | 0.996079815     |
| F-1-2     | 0.964942363     |   | F-1-2  | 0.996275932     |
| F-1-3     | 0.979212339     |   | F-1-3  | 0.995883698     |
| F-1-4     | 0.977632155     |   | F-1-4  | 0.994511418     |
| F-2-1     | 0.995587976     |   | F-2-1  | 0.992747981     |
| F-2-2     | 0.996537667     |   | F-2-2  | 0.990591464     |
| F-2-3     | 0.997832517     |   | F-2-3  | 0.995295348     |
| F-2-4     | 0.995411279     |   | F-2-4  | 0.992355593     |
| F-3-1     | 0.998212388     |   | F-3-1  | 0.996667551     |
| F-3-2     | 0.995864261     |   | F-3-2  | 0.995687658     |
| F-3-3     | 0.996567372     |   | F-3-3  | 0.997844098     |
| F-3-4     | 0.997069664     |   | F-4-1  | 0.997452095     |
| F-4-1     | 0.992809392     |   | F-4-2  | 0.995491541     |
| F-4-2     | 0.997522437     |   | F-4-3  | 0.996667474     |

|       |             |       |             |
|-------|-------------|-------|-------------|
| F-4-3 | 0.999690389 | F-4-4 | 0.997843560 |
| F-4-4 | 0.999017127 | H-0-1 | 0.993139523 |
| H-0-1 | 0.999813146 | H-0-2 | 0.993334948 |
| H0-2  | 0.998442157 | H-0-3 | 0.998235871 |
| H-0-3 | 0.99964946  | H-0-4 | 0.995492156 |
| H-0-4 | 0.999457538 | H-1-1 | 0.994315301 |
| H-1-1 | 0.999788163 | H-1-2 | 0.999607920 |
| H-1-2 | 0.999404605 | H-1-3 | 0.992746828 |
| H-1-3 | 0.999607191 | H-1-4 | 0.994511803 |
| H-1-4 | 0.994056092 | H-2-1 | 0.998040522 |
| H-2-1 | 0.998423324 | H-2-2 | 0.991375393 |
| H-2-2 | 0.997718006 | H-2-3 | 0.994315532 |
| H-2-3 | 0.997694508 | H-2-4 | 0.995492464 |
| H-2-4 | 0.99929536  | H-3-1 | 0.993139061 |
| H-3-1 | 0.999080388 | H-3-2 | 0.997059784 |
| H-3-2 | 0.999168458 | H-3-3 | 0.996275932 |
| H-3-3 | 0.998413173 | H-3-4 | 0.997255824 |
| H-3-4 | 0.999741592 | H-4-1 | 0.995491848 |
| H-4-1 | 0.999175145 | H-4-2 | 0.997843868 |
| H-4-2 | 0.998616728 | H-4-3 | 0.998824144 |
| H-4-3 | 0.998694909 | H-4-4 | 0.998040061 |
| H-4-4 | 0.999795348 |       |             |
| Mean  | 0.991690413 |       | 0.995613396 |

The first letters C, F, and H denote control, F17, and H52 groups, respectively;

The second number 0, 1, 2, 3, 4 represents storage time of 0, 12, 24, 48, 72 hours, respectively; The third number 1, 2, 3, 4 indicates four repeats per treatment.
